# Supplementary material for: Silk fibroin-based hemostatic powders with instant and robust adhesion performance for sutureless sealing of gastrointestinal defects
Source: Royal Society of Chemistry journal article supplement (doi:10.1039/d4tb00554f), 2024-01-01
Supplement: d4tb00554f1.pdf [file d4tb00554f1.pdf]

## Supporting Information:

# Silk Fibroin-based Hemostatic Powders with Instant and Robust Adhesion Performance for Sutureless Sealing of Gastrointestinal Defects

Aizhen Geng,<sup>a</sup> Yuting Luo,<sup>b</sup> Min Zheng,<sup>a</sup> Jie Zheng,<sup>a</sup> Rui Zhu<sup>a</sup> and Shumeng Bai<sup>\*a</sup>

<sup>a</sup> College of Biological Science and Engineering, Fuzhou University, Fuzhou, Fujian 350108, China.

<sup>b</sup> College of Chemistry, Fuzhou University, Fuzhou, Fujian 350108, China.

\* Corresponding author:

Email: shumengbai@fzu.edu.cn.

## Supporting Figures

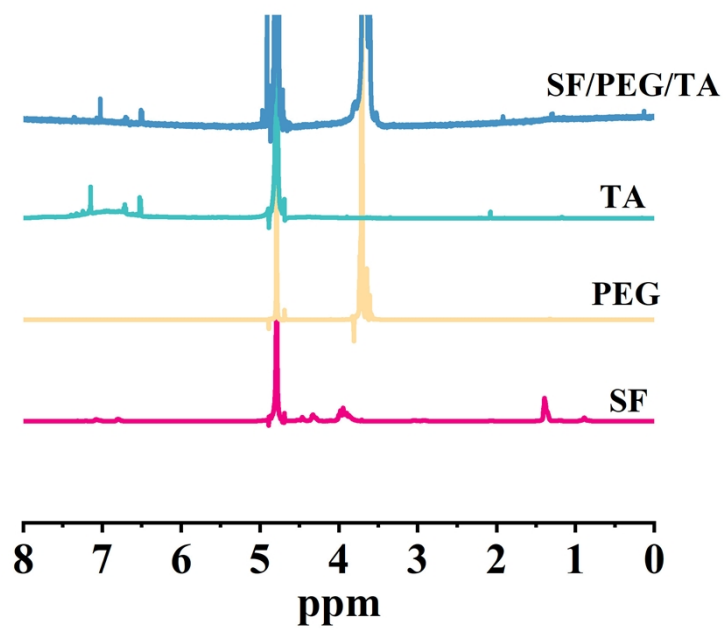

**Figure S1.** <sup>1</sup>H-NMR spectra of the SF/PEG/TA powder and its starting components.

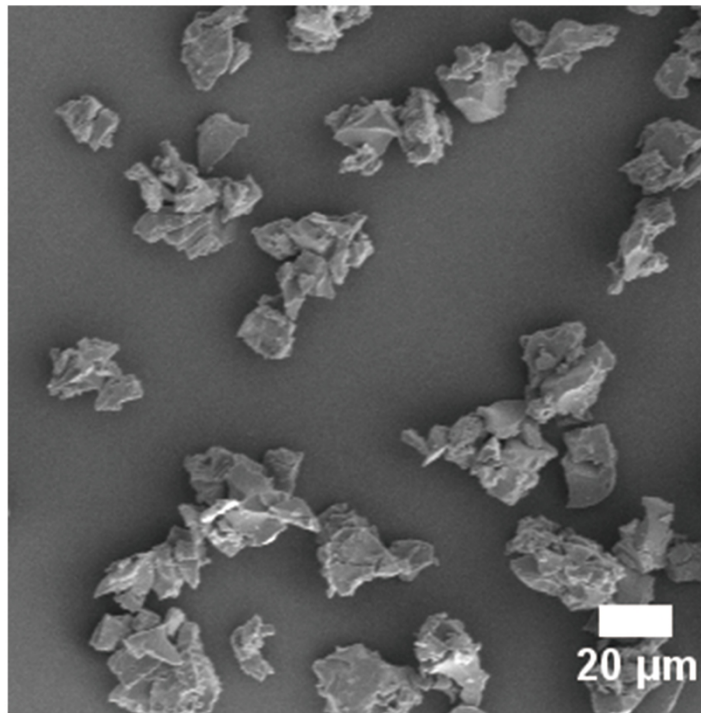

**Figure S2.** The average size of the SF/PEG/TA powder.

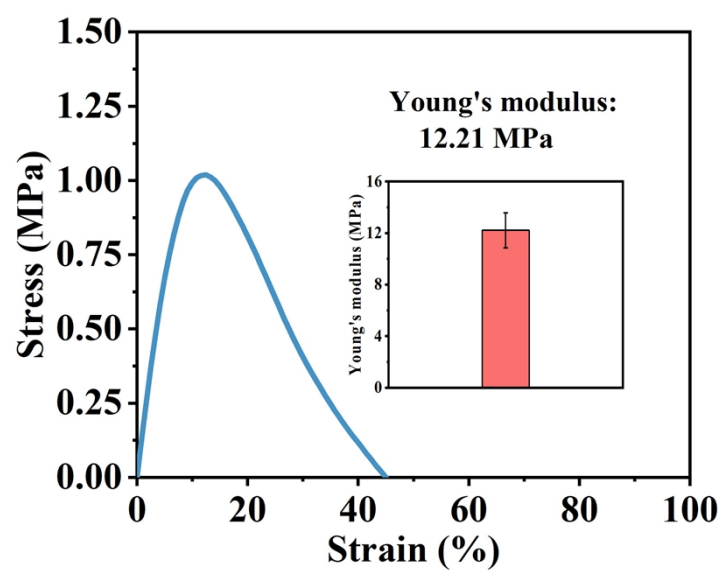

**Figure S3.** Representative tensile strain-stress curve of the SF/PEG/TA powder-derived hydrogel.

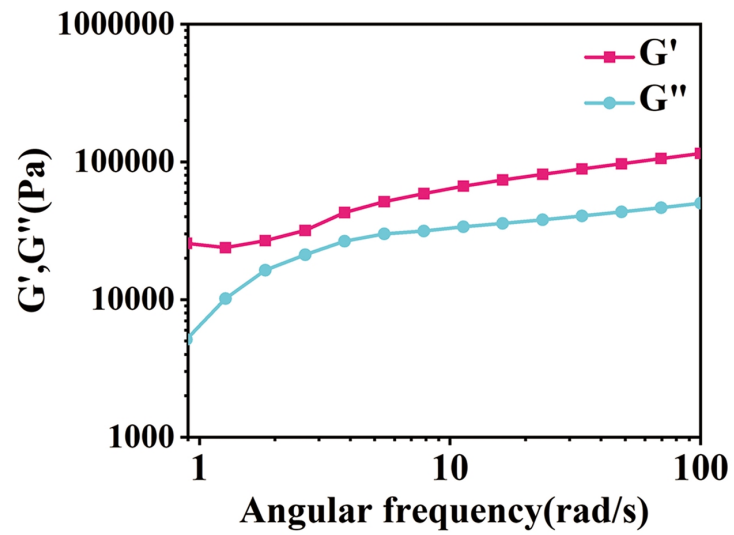

**Figure S4.** The frequency-dependent oscillatory rheology of SF/PEG/TA powder-derived hydrogel, validating the stable gel-like behavior across the whole range of frequencies.

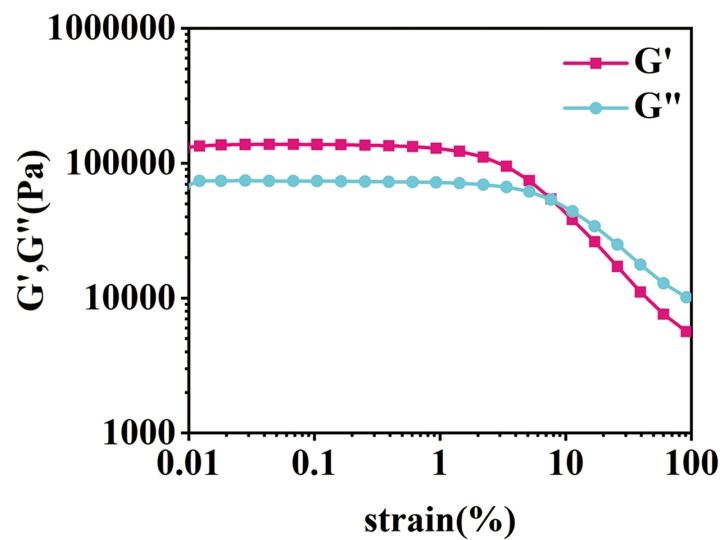

**Figure S5.** Strain-dependent oscillatory rheology of SF/PEG/TA powder-derived hydrogel at a constant angular frequency ( $10 \text{ rad s}^{-1}$ ).

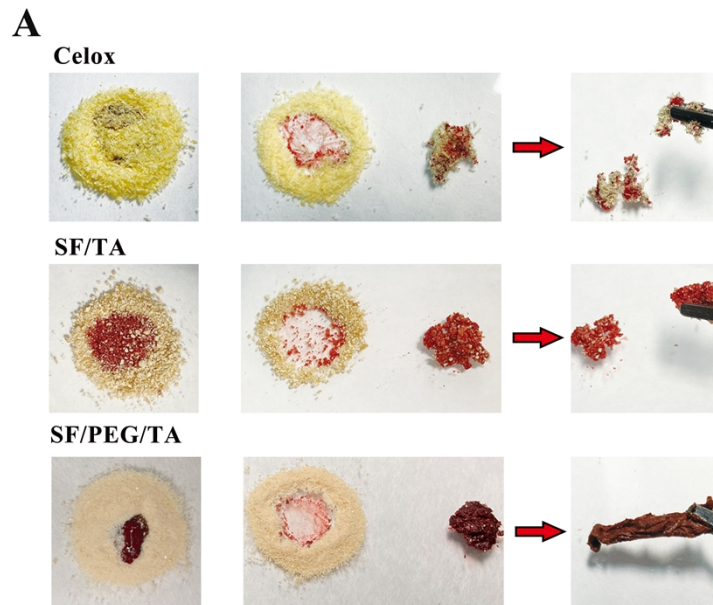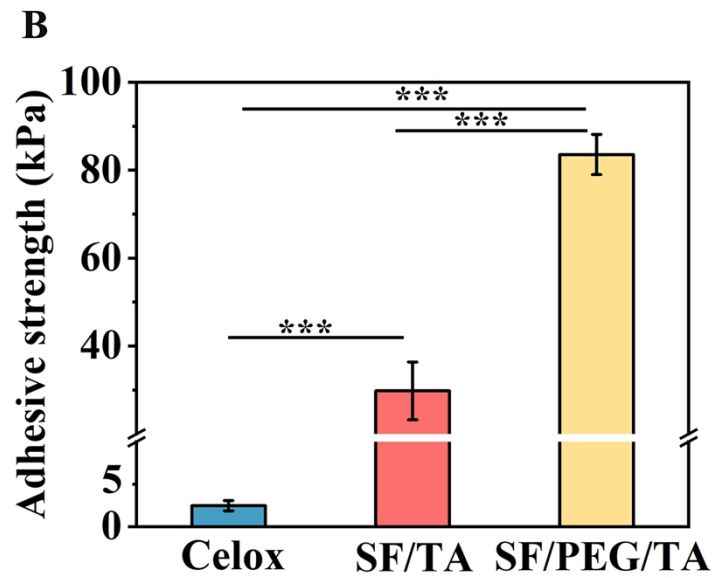

**Figure S6.** (A) The wet adhesion performance of SF/PEG/TA powder driven by self-gelling upon contact with the blood. (B) Corresponding adhesion strength of SF/PEG/TA powder on the plastic substrate via a lap shear adhesion test.

### SF/TA

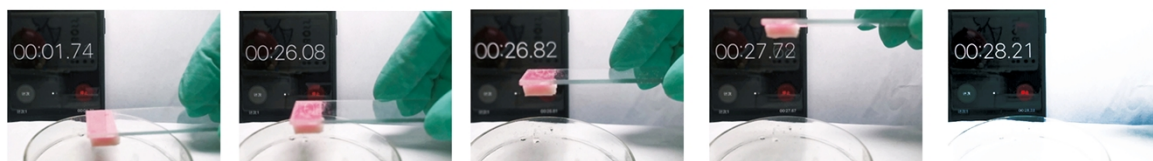

### Celox

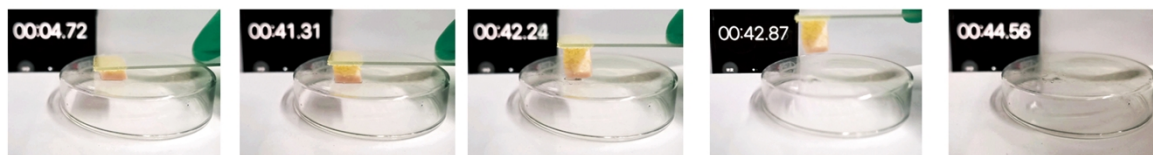

**Figure S7.** Photos of SF/TA or Celox powder fixed on a glass plate to adhere to wet porcine skin.



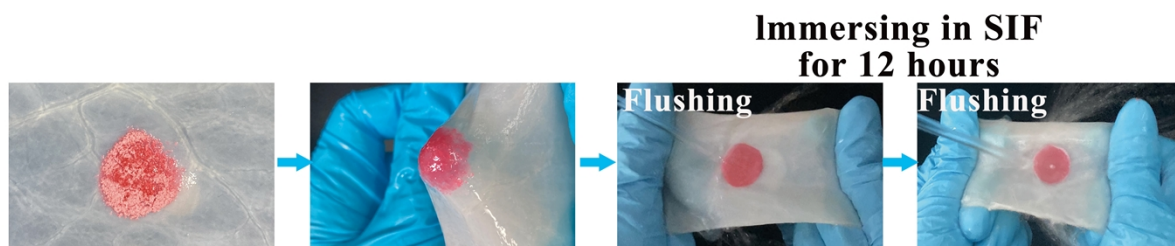

**Figure S8.** Adhesion images of Rhodamine B-stained SF/PEG/TA powder on wet porcine intestine.

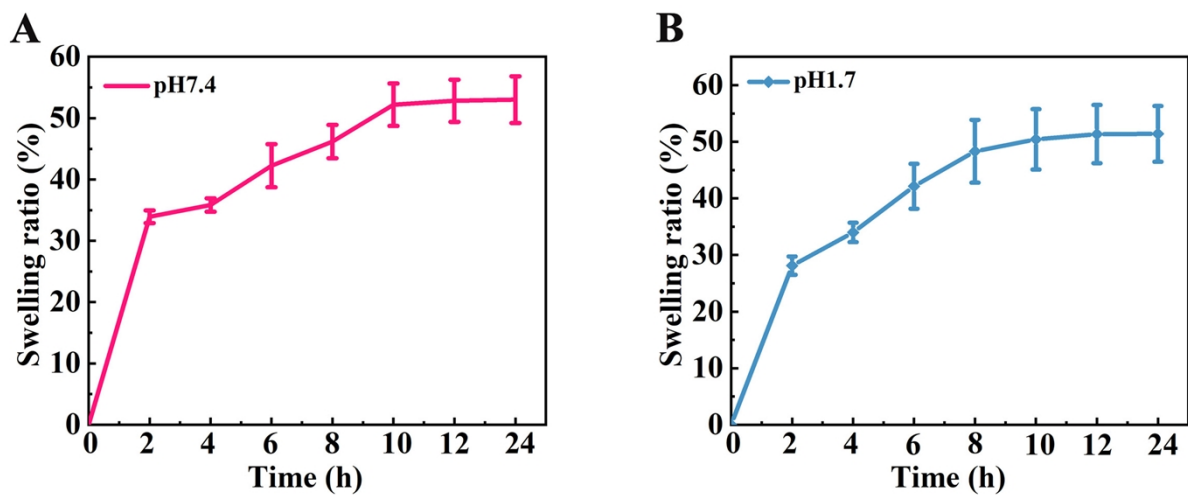

**Figure S9.** The in vitro swelling behavior of the SF/PEG/TA powder-derived hydrogel in phosphate buffered saline (PBS, pH 7.4 or 1.7) at 37 °C for 24 hours.

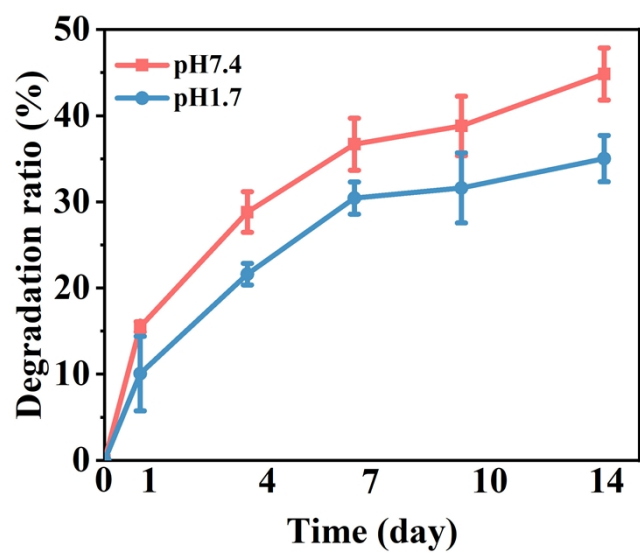

**Figure S10.** The in vitro degradation of the SF/PEG/TA powder-derived hydrogel in aqueous solution of  $1 \text{ U mL}^{-1}$  protease XIV (PBS, pH 7.4 or 1.7).

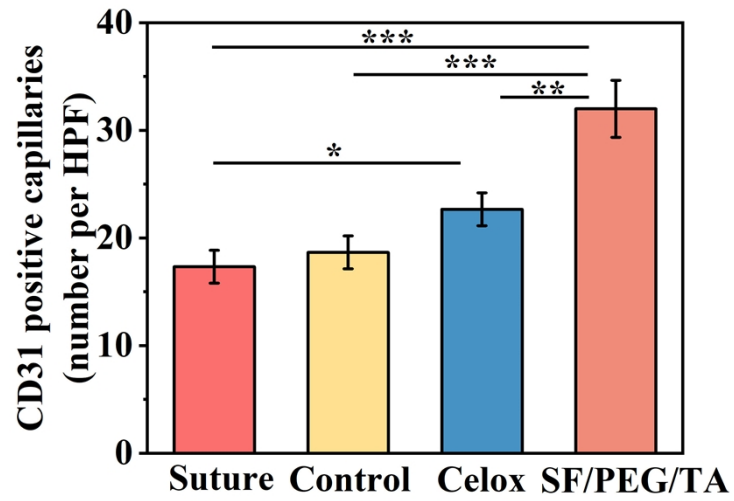

**Figure S11.** Quantitative analysis of CD31-positive capillaries for different groups in a rat skin incision model.

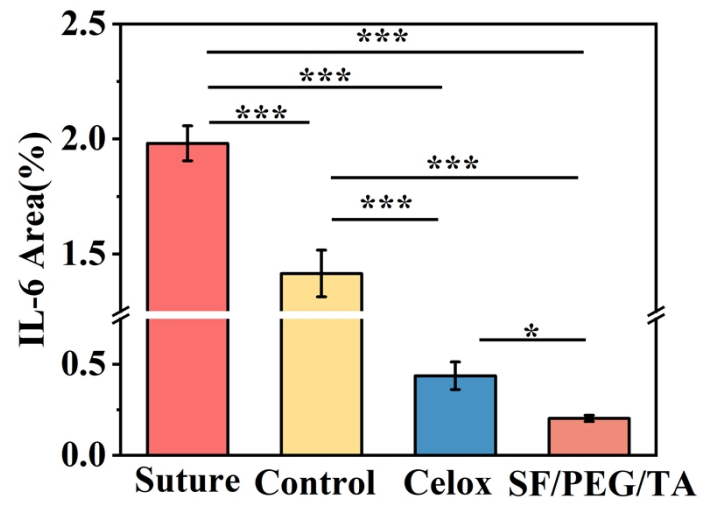

**Figure S12.** Quantitative analysis of the relative fluorescent intensity of IL-6 for different groups in a rat skin incision model.

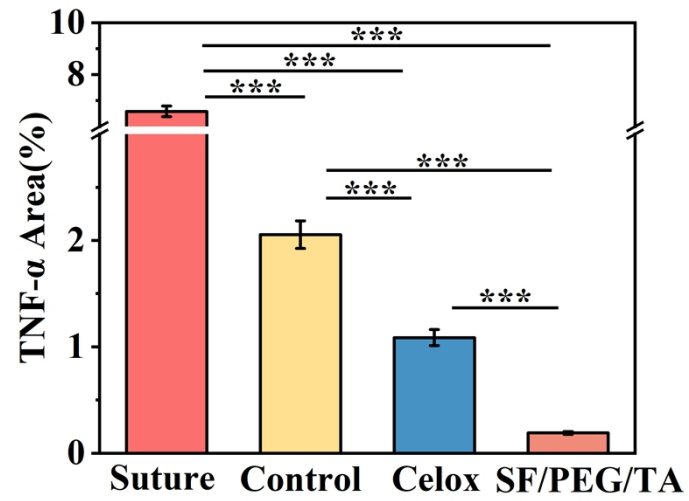

**Figure S13.** Quantitative analysis of the relative fluorescent intensity of TNF- $\alpha$  for different groups in a rat skin incision model.

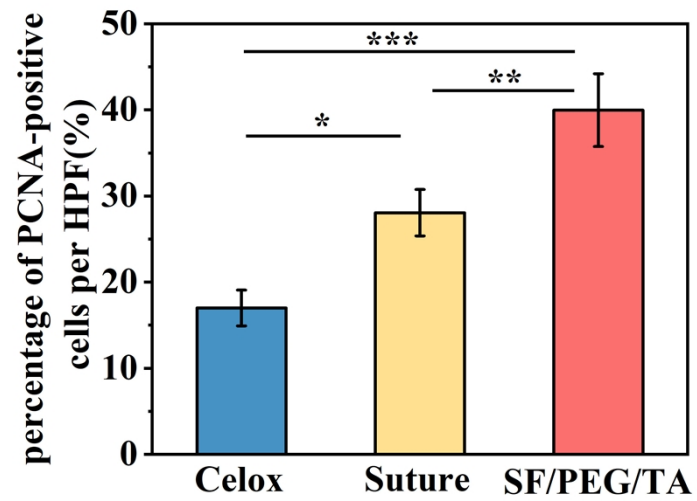

**Figure S14.** Quantitative analysis of PCNA-positive cells for different groups in a rat gastrointestinal perforation model.

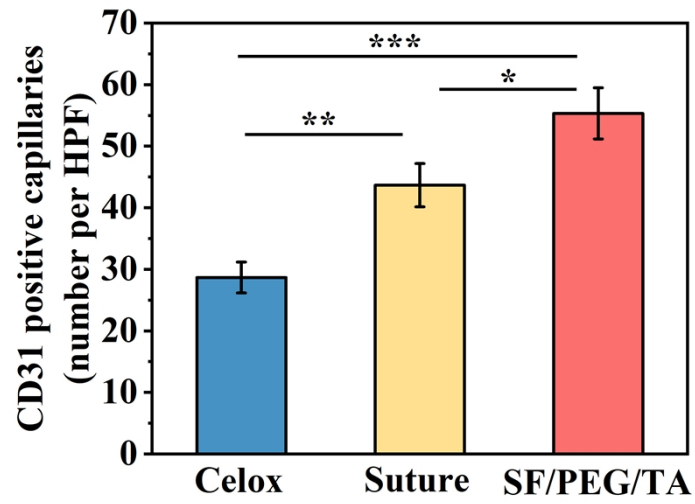

**Figure S15.** Quantitative analysis of CD31-positive capillaries for different groups in a rat gastrointestinal perforation model.
